# Supplementary material
Source: MDPI journal article supplement (https://www.mdpi.com/2306-5729/7/3/35)
Supplement: s1 [file s1]

Archive with 3 entries (3 files):
- Data process and analysis.pdf
- TableS1_AP_CP_RNAseqData.pdf
- TableS2_AB_CB_RNAseqData.pdf
